# Supplementary material for: A strategy to quantify myofibroblast activation on a continuous spectrum
Source: PubMed Central journal article supplement (PMC9293987; doi:10.1038/s41598-022-16158-7), 2022-07-18
Supplement: 41598_2022_16158_MOESM1_ESM.pdf [file 41598_2022_16158_MOESM1_ESM.pdf]

## Supplementary Information

### A Strategy to Quantify Myofibroblast Activation on a Continuous Spectrum

Alexander Hillsley, Matthew S. Santoso, Sean M. Engels, Kathleen N. Halwachs, Lydia M. Contreras, Adrienne M. Rosales\*

| Feature                       | Activated |          | Non-Activated |         |
|-------------------------------|-----------|----------|---------------|---------|
|                               | avg       | error    | avg           | error   |
| Cell Area                     | 22631.89  | 13733.01 | 4002.48       | 3166.87 |
| Cell Perimeter                | 1397.04   | 674.56   | 410.99        | 241.26  |
| Cell Major Axis Length        | 242.41    | 75.55    | 113.70        | 56.03   |
| Cell Minor Axis Length        | 152.39    | 59.06    | 53.46         | 25.08   |
| Cell Circularity              | 0.17      | 0.10     | 0.27          | 0.10    |
| Cell Eccentricity             | 0.71      | 0.17     | 0.82          | 0.14    |
| Cell Extent                   | 0.46      | 0.13     | 0.46          | 0.13    |
| Nucleus Area                  | 485.79    | 319.75   | 189.92        | 96.03   |
| Nucleus Perimeter             | 86.94     | 39.45    | 53.32         | 15.27   |
| Nucleus Major Axis Length     | 29.14     | 12.15    | 19.27         | 5.12    |
| Nucleus Minor Axis Length     | 19.21     | 8.48     | 12.09         | 3.42    |
| Nucleus Circularity           | 0.69      | 0.24     | 0.80          | 0.13    |
| Nucleus Eccentricity          | 0.68      | 0.21     | 0.75          | 0.12    |
| Nuc Cyt Ratio                 | 0.02      | 0.01     | 0.04          | 0.01    |
| Minkowski-Bouligand dimension | 1.16      | 0.08     | 1.09          | 0.09    |
| Mean Pearson's r whole        | 0.24      | 0.29     | -0.14         | 0.25    |
| Mean Pearson's r 64x64        | 0.47      | 0.20     | 0.11          | 0.20    |
| Mean Pearson's r 32x32        | 0.49      | 0.18     | 0.19          | 0.15    |
| Mean Pearson's r 16x16        | 0.48      | 0.18     | 0.20          | 0.13    |
| Mean Pearson's r 8x8          | 0.44      | 0.17     | 0.18          | 0.11    |
| Mean Pearson's r 4x4          | 0.37      | 0.16     | 0.13          | 0.09    |

**Table S1.** Average value and standard deviation of all measured cell features. Units are in  $\mu\text{m}$  for perimeters and axis lengths,  $\mu\text{m}^2$  for areas, and unitless for all other features.

#### Measured Cell Feature Descriptions

Area, perimeter, major/minor axis, eccentricity, and extent were all measured using the `scipy.measure.regionprops` python function. More information can be found in their documentation.

1. Cell/Nucleus Area: The number of pixels in the mask, multiplied by the size of each pixel
2. Cell/Nucleus Perimeter: Approximated, by drawing a line through the center of each border pixel in the mask

3. Cell/Nucleus Major/Minor Axis Length: the major or minor axis of an ellipse fit to the mask
4. Cell/Nucleus Circularity: The ratio of mask area, to the area of a circle with the same perimeter as the mask. This gives a measure of how close to a perfect circle the cell shape is. A perfect circle has a circularity of 1 while a line has a circularity of 0
5. Cell/Nucleus Eccentricity: The eccentricity of an ellipse fit to the mask. The eccentricity is the ratio of the focal distance (distance between focal points) over the major axis length.
6. Cell/Nucleus Extent: The ratio of the area of a cell divided by the size of the smallest possible bounding box, or rectangle that can fully encompass the cell. Cell extent is a measure of how spread out a cell is
7. Nuc / Cyt ratio: The ratio of the area of the nucleus to the area of the cell.
8. Minkowski-Bouligand Dimension: A method of estimating the fractal dimension of the cell mask. This provides a measure of how rough the cell boundary is.
9. Mean Pearson's R: The Pearson's correlation coefficient between the a-SMA (green) and F-Actin (red) channels of the image. Pearson's R must be calculated over multiple pixels, therefore the image was first broken down into tiles of various sizes (4, 8, 16, 32, and 64 pixels). Pearson's R was then calculated for each tile, and all the tiles in an image averaged. A value of 0 corresponds to random / no correlation, while a value of 1 corresponds to perfect correlation.

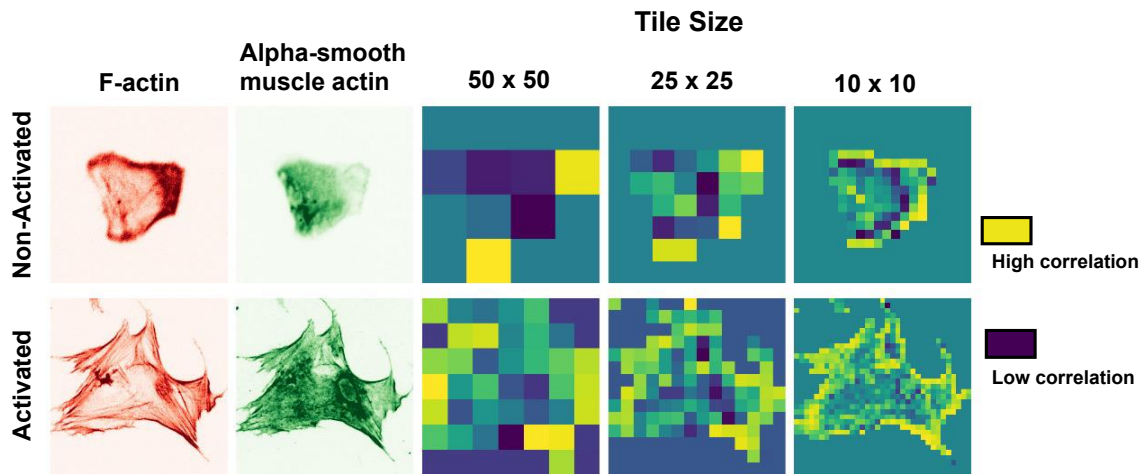

**Figure S1.** Colocalization of F-actin and alpha-SMA was quantified using the Pearson's correlation coefficient ( $R_p$ ). In Python, the image was first broken into a series of small tiles (Tile sizes of 50 x 50, 25 x 25, and 10 x 10 pixels shown).  $R_p$  was then calculated for each tile (yellow – high colocalization, purple – low colocalization). All cell containing tiles were then averaged to calculate an average colocalization for each cell. On average, activated cells had a significantly higher degree of colocalization across all tile sizes.

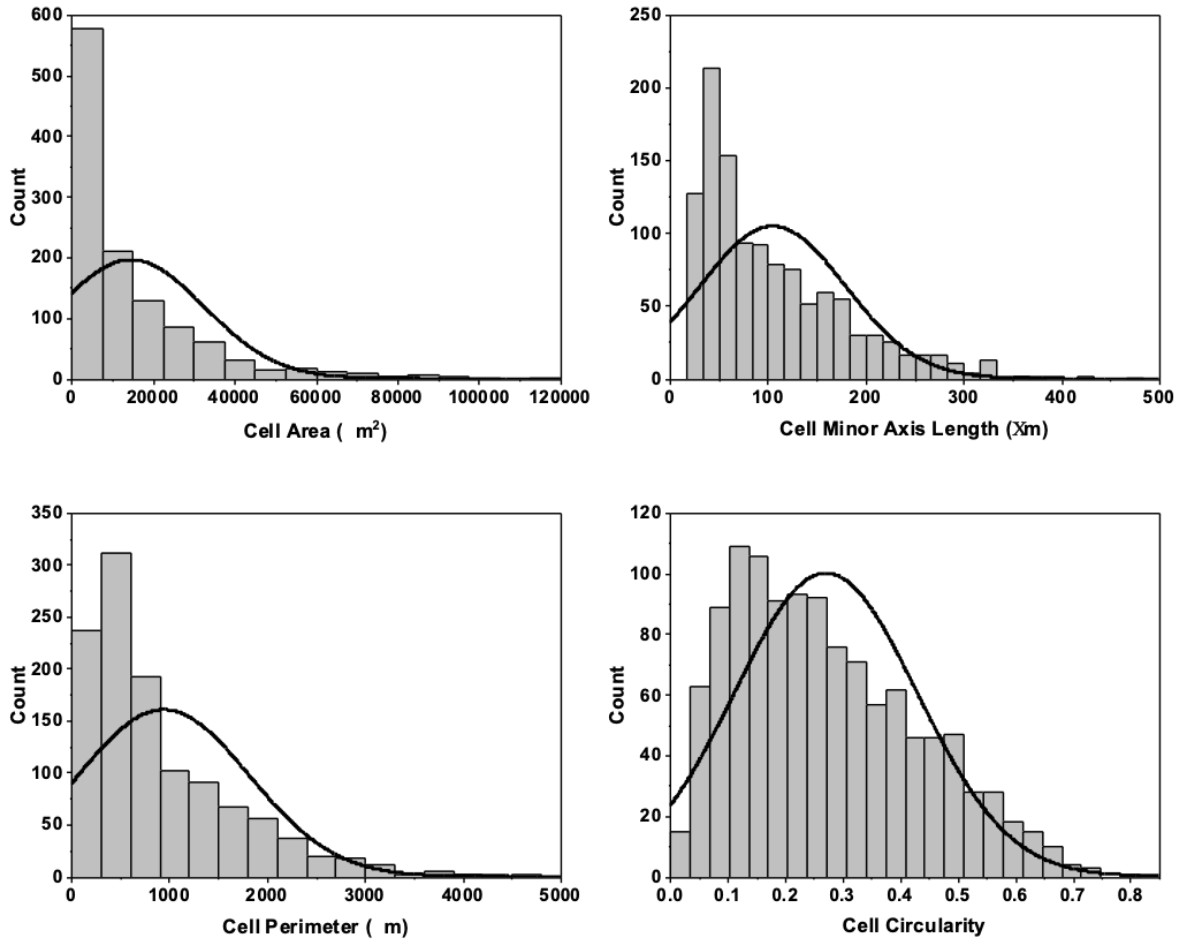

**Figure S2.** Histograms of four measured cell features for all 1170 cells. Without manually separating activated myofibroblasts from non-activated fibroblasts, the cells appear to be a part of a single distribution.

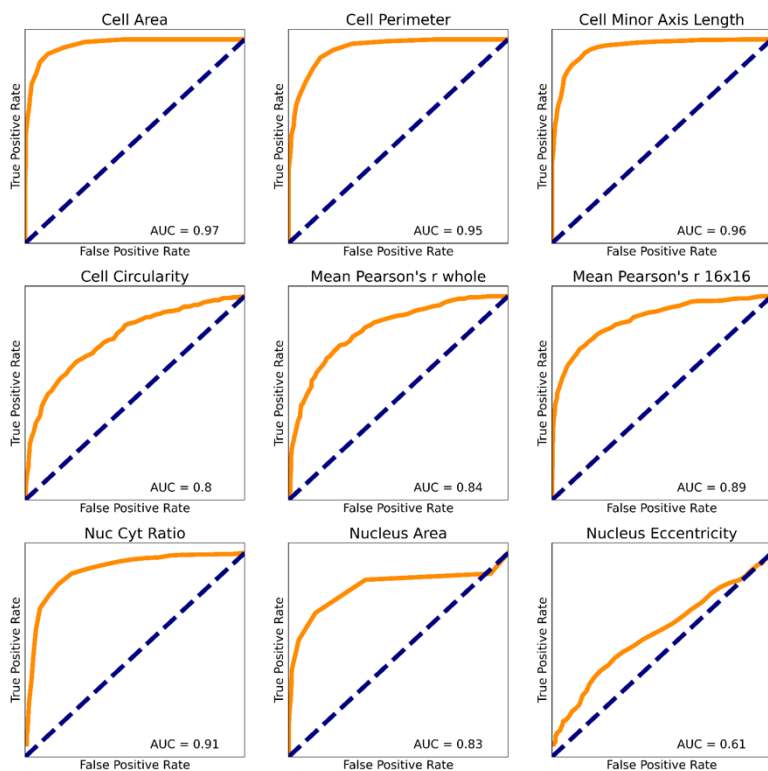

| Property                      | AUC  |
|-------------------------------|------|
| Cell Area                     | 0.97 |
| Cell Minor                    | 0.96 |
| Cell Perimeter                | 0.95 |
| Cell Major                    | 0.92 |
| Nuclear/Cytosolic ratio       | 0.91 |
| Pearson's R 64x64             | 0.90 |
| Pearson's R 8x8               | 0.89 |
| Pearson's R 32x32             | 0.89 |
| Pearson's R 4x4               | 0.89 |
| Pearson's R 16x16             | 0.89 |
| Pearson's R whole             | 0.84 |
| Nuclear Area                  | 0.83 |
| Nuclear Major                 | 0.82 |
| Nuclear Minor                 | 0.82 |
| Nuclear Perimeter             | 0.81 |
| Cell Circularity              | 0.80 |
| Minkowski–Bouligand dimension | 0.72 |
| Cell Eccentricity             | 0.69 |
| Nuclear Circularity           | 0.66 |
| Nuclear Eccentricity          | 0.61 |
| Cell Extent                   | 0.51 |

**Figure S3.** ROC curves for nine measured cell features. AUC values were calculated from ROC curves for all 21 features and are shown in the table.

# Decision Tree

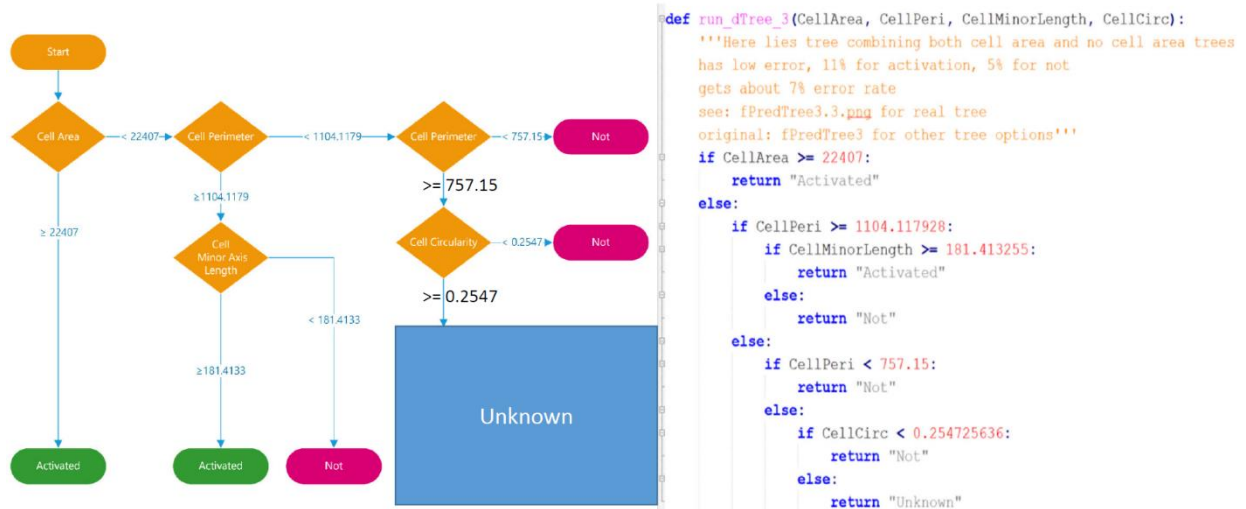

Figure S4. Illustration of the decision tree model and the “if” statements used in its code.

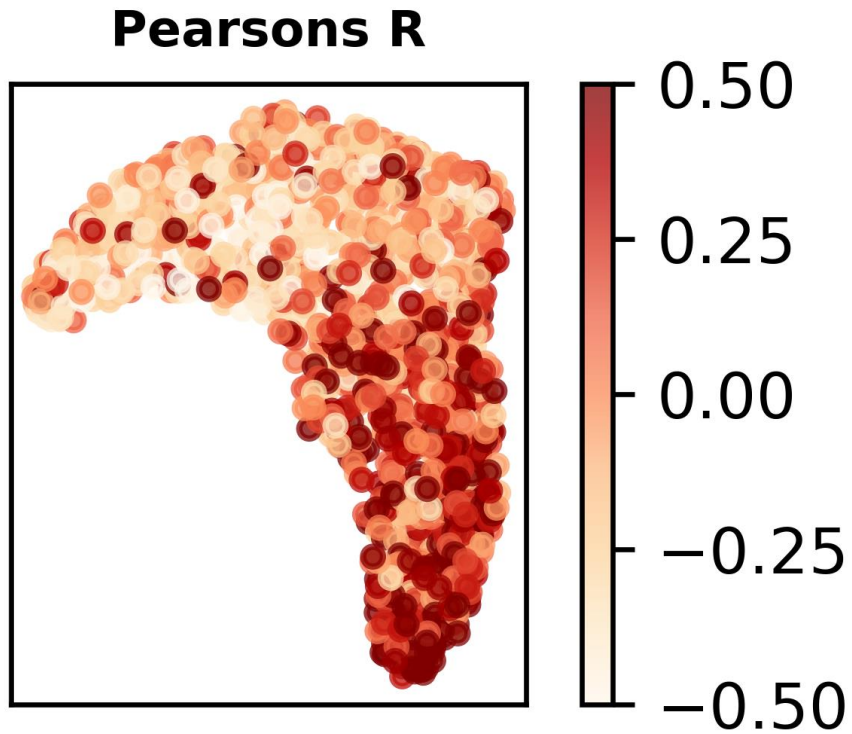

**Figure S5.** To further compare our classification models to traditional measures of activation (a-SMA stress fiber formation), heatmaps were generated with individual cells colored by their Pearson's R coefficient.

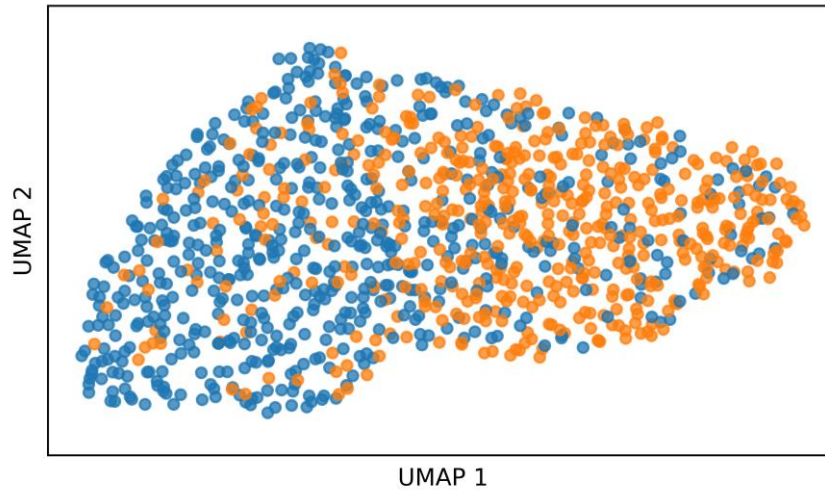

**Figure S6.** A traditional measure of myofibroblast activation is the association of  $\alpha$ -SMA into stress fibers. In order to demonstrate that our manually engineered model agrees with this traditional classification method, another UMAP and PCA plot were constructed, containing the Pearson's R coefficient for the whole cell, in addition to the 4 properties listed in Figure 2A. This UMAP reduction shows a similar spectrum of activation, this time along the UMAP 1 axis. Specific axes have no meaning in UMAP reductions, so this trend matches that in figure 2C.



A)

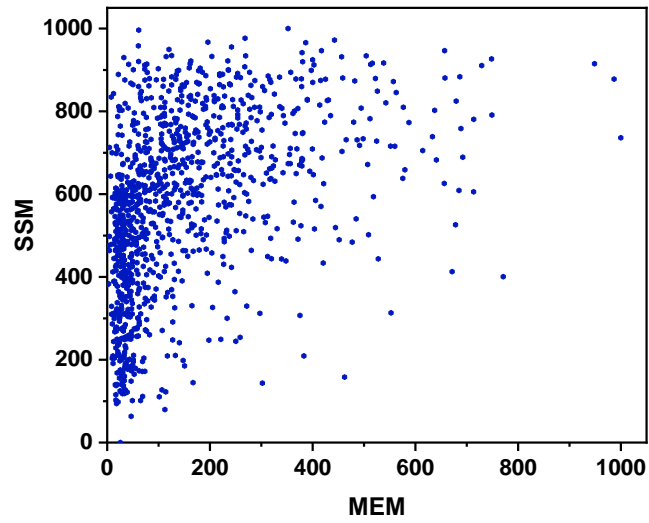

B)

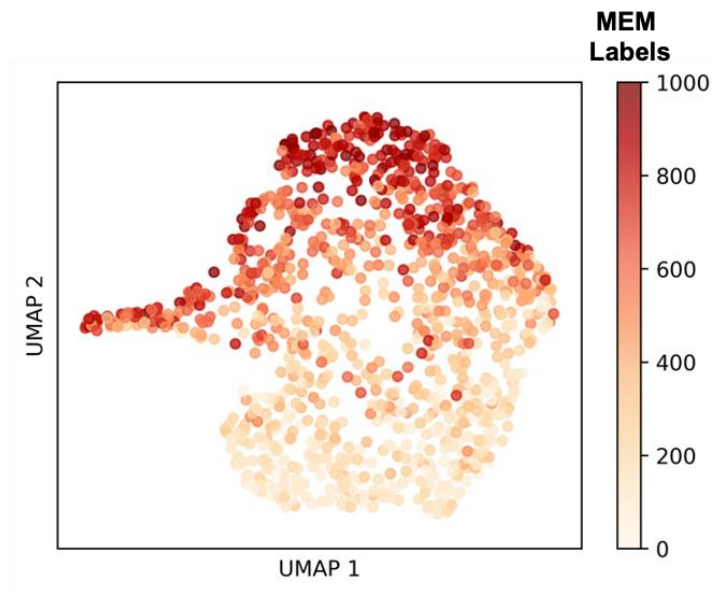

**Figure S7.** Comparison of the SSM and MEM label systems. A) SSM provides a relatively even distribution of labels between 0 and 1,000, while the MEM labels are clustered at the lower end of the spectrum, with very few cells labeled > 800. B) MEM labels imposed on the SSM UMAP.

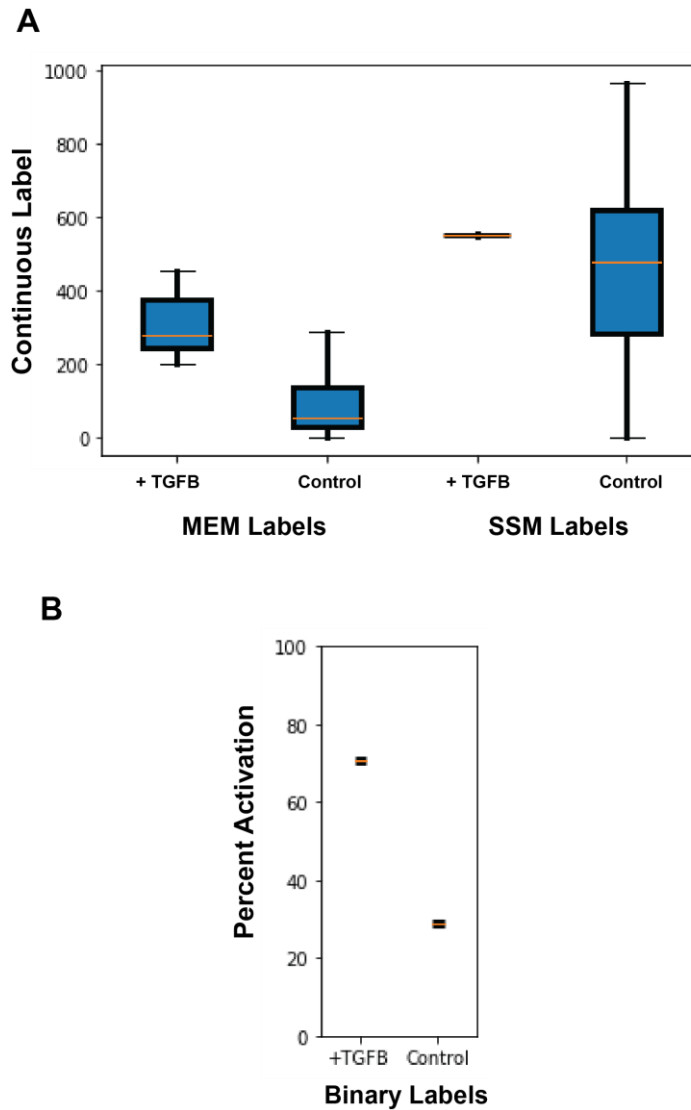

**Figure S8.** As a proof of concept, cardiac fibroblasts were cultured in TGFB+ media (complete DMEM, 10% FBS, 1% PS, 10 ng/mL TGFB), fixed, stained, and pushed through the same analysis pipelines (Figures 2A and 3A), to assign them labels in the same continuous systems reported in Figures 2 and 3. More information on this analysis can be found on the Github page. In total 24 cells, grown in TGFB+ media, were analyzed. The control group for this study, 500 cells, imaged across 3 separate cultures, from the original dataset (Figure 1A). Only the first 3 separate cultures were used, because they captured the true ratio of activated to non-activated cells. A) Both the MEM and the SSM capture an increase in average percent activation with the addition of TGFB, although the SSM model shows only a slight increase. B) The binary or traditional labeling system shows a significant increase in activation

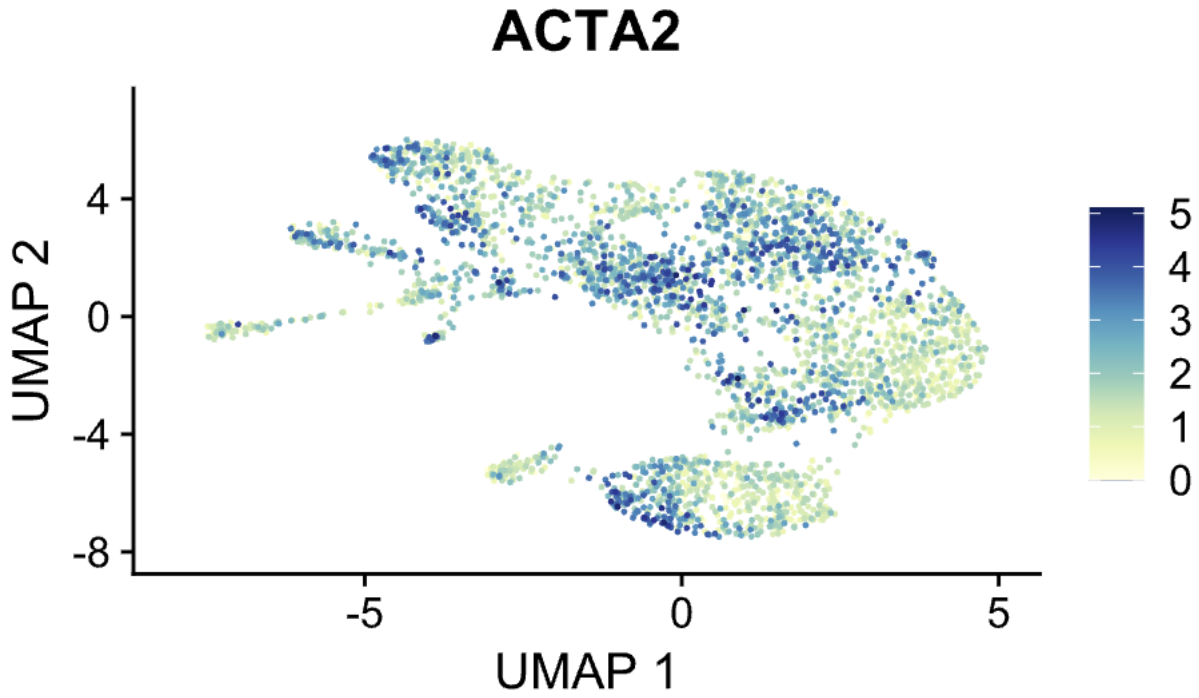

**Figure S9.** UMAP reduction of scRNA-seq analysis of 4,062 cells. Each individual cell is colored by its normalized expression levels of ACTA\_2, the gene responsible for a-SMA production. Darker colors represent higher expression levels. Although less differentially expressed, this heatmap shows similar trends with other myofibroblast associated genes, increasing in the negative UMAP 1 direction.

| PC 1         |                | PC2          |                |
|--------------|----------------|--------------|----------------|
| Up-Regulated | Down-Regulated | Up-Regulated | Down-Regulated |
| MT2A         | MALAT1         | PTX3         | S100A16        |
| KRT18        | GAS5           | ANKRD1       | S100A6         |
| TIMP1        | S100A16        | CCN2         | AKR1C1         |
| UACA         | FGF2           | ADAMTS1      | AKR1C3         |
| POSTN        | RALA           | FGF2         | S100A4         |
| CRYAB        | MFAP5          | MALAT1       | MFAP5          |
| IGFBP5       | DDIT3          | PPME1        | TMEM158        |
| PLAT         | THBS1          | TNFRSF11B    | GAPDH          |
| TFPI2        | VIPR1          | THBS1        | S100A10        |
| PRSS23       | NIBAN1         | INHBA        | NRP2           |
| LGALS1       | ZFAS1          | TPM1         | TIMP1          |
| MYL9         | SH3BGR         | KRT18        | FTL            |
| SPARC        | NRP2           | SERPINE1     | AKR1C2         |
| GAPDH        | PTX3           | PCDH10       | VIM            |
| HSPB6        | TGFB2          | CALD1        | FTH1           |
| SH3BGRL3     | HSPA5          | COL8A1       | RARRES2        |
| TPM2         | AKR1C1         | MMP1         | CTHRC1         |
| SCUBE3       | GDF15          | FST          | PDLIM4         |
| TGFB1        | SLC3A2         | PCDH17       | CLEC2B         |
| MGP          | SYT1           | UACA         | AKR1B1         |
| COL1A1       | NEAT1          | CDC42EP3     | LGALS3         |
| VIM          | GADD45A        | ANK3         | CTSK           |
| PRSS3        | C5orf46        | UGCG         | MEG3           |
| CD59         | NNMT           | RGS4         | MMP3           |
| TMSB10       | EFEMP1         | SYNE1        | SPON2          |
| THY1         | EPAS1          | DSP          | CFH            |
| TUBB3        | IFI16          | RND3         | TIMP3          |
| SERF2        | TRIB3          | STAT1        | S100A13        |
| ACTB         | AKR1C3         | DDIT3        | SPP1           |
| IGFBP7       | PCDH10         | POSTN        | KCTD12         |

**Table S3.** List of genes significantly up and down regulated along PC 1 and PC 2 axes of the scRNA-seq analysis. Upregulated genes become more highly expressed in the positive direction of PC 1 and PC 2, while the opposite is true for downregulated genes. These genes contribute the most to the variance seen between all measured cells.

| Cluster | # of Cells | % Total |
|---------|------------|---------|
| 1       | 776        | 22.0%   |
| 2       | 648        | 18.4%   |
| 3       | 517        | 14.6%   |
| 4       | 458        | 13.0%   |
| 5       | 431        | 12.2%   |
| 6       | 219        | 6.2%    |
| 7       | 121        | 3.4%    |
| 8       | 112        | 3.2%    |
| 9       | 87         | 2.5%    |
| 10      | 75         | 2.1%    |
| 11      | 67         | 1.9%    |
| 12      | 20         | 0.6%    |
| Total   | 3531       |         |

**Table S4.** The total number of cells in each cluster of Figure 4A. Clusters were generated automatically using the Seurat software.
